# Supplementary material
Source: PubMed Central journal article supplement (PMC6233789)
Supplement: jamasurg-153-929-s001.pdf [file jamasurg-153-929-s001.pdf]

## Supplementary Online Content

Hilliard PE, Waljee J, Moser S, et al. Prevalence of Preoperative Opioid Use and Characteristics Associated With Opioid Use Among Patients Presenting for Surgery. *JAMA Surg*. Published online July 11, 2018.  
doi:10.1001/jamasurg.2018.2102

**eTable 1.** Primary Anesthesia *Current Procedural Terminology* Codes and Surgical Body Area Codes

**eTable 2.** Percentage of Patients Who Used Opioids Before Surgery by Surgical Service and Percentage of Each Type of Opioid Used

This supplementary material has been provided by the authors to give readers additional information about their work.

**eTable 1.** Primary Anesthesia *Current Procedural Terminology* Codes and Surgical Body Area Codes

| <b>Primary Anesthesia CPT Subgroups</b> | <b>Surgical Service Body Area</b> |
|-----------------------------------------|-----------------------------------|
| 00100 to 00299                          | Head                              |
| 00300 to 00399                          | Neck                              |
| 00400 to 00499                          | Thorax                            |
| 00500 to 00599                          | Intrathoracic                     |
| 00600 to 00699                          | Spine/Spinal Cord                 |
| 00700 to 00799                          | Upper Abdomen                     |
| 00800 to 00899                          | Lower Abdomen                     |
| 00900 to 00999                          | Perineum                          |
| 01000 to 01199                          | Pelvis (Except Hip)               |
| 01200 to 01299                          | Upper Leg (Except Knee)           |
| 01300 to 01444                          | Knee/Popliteal                    |
| 01445 to 01599                          | Lower Leg                         |
| 01600 to 01699                          | Shoulder/Axilla                   |
| 01700 to 01799                          | Upper Arm & Elbow                 |
| 01800 to 01899                          | Forearm, Wrist, Hand              |
| 01900 to 01950                          | Radiologic                        |
| 01951 to 01953                          | Burn                              |
| 01954 to 01989                          | Obstetric                         |
| 01990 to 01999                          | Other                             |

**eTable 2.** Percentage of Patients Who Used Opioids Before Surgery by Surgical Service and Percentage of Each Type of Opioid Used

|                                                             | Overall      | Cardiac | General/Gastrointestinal | General/Endocrine | Gynecology | General/Hepatology | Internal Medicine | Neurosurgery - Spine | Neurosurgery - Head | Neurosurgery - All others | Oral Surgery/Dentistry | Orthopedic - Hand non-art hr | Orthopedic - Spine | Orthopedic - Arthroplasty (hip, knee, ankle, shoulder, elbow, hand) | Orthopedic - All others |
|-------------------------------------------------------------|--------------|---------|--------------------------|-------------------|------------|--------------------|-------------------|----------------------|---------------------|---------------------------|------------------------|------------------------------|--------------------|---------------------------------------------------------------------|-------------------------|
|                                                             | (n = 34,186) | 334     | 2308                     | 1654              | 3165       | 1021               | 491               | 1081                 | 771                 | 409                       | 1033                   | 746                          | 347                | 1990                                                                | 3307                    |
| Opioid use prior to surgery                                 | 23.1%        | 10.8    | 19.3                     | 14.3              | 16.3       | 23.7               | 12.4              | 55.1                 | 19.7                | 34.7                      | 28.1                   | 23.3                         | 65.1               | 33.5                                                                | 27.0                    |
| <b>Types of opioids used by pre-op opioid users</b>         |              |         |                          |                   |            |                    |                   |                      |                     |                           |                        |                              |                    |                                                                     |                         |
| Hydrocodone                                                 | 59.3         | 47.2    | 55.6                     | 60.6              | 59.7       | 55.8               | 52.5              | 58.4                 | 53.9                | 50.7                      | 58.8                   | 59.2                         | 60.0               | 51.3                                                                | 60.8                    |
| Tramadol                                                    | 21.3         | 25.0    | 28.9                     | 23.7              | 23.4       | 21.1               | 26.2              | 18.3                 | 21.1                | 23.2                      | 18.7                   | 20.7                         | 18.7               | 35.8                                                                | 16.0                    |
| Oxycodone PO                                                | 18.30        | 13.9    | 17.9                     | 14.4              | 13.6       | 16.9               | 23.0              | 21.3                 | 19.1                | 21.8                      | 22.1                   | 19.5                         | 20.0               | 13.0                                                                | 24.3                    |
| Morphine                                                    | 5.8          | 5.6     | 6.7                      | 2.1               | 6.0        | 9.5                | 3.3               | 10.1                 | 3.3                 | 9.2                       | 3.8                    | 3.4                          | 11.6               | 4.2                                                                 | 3.0                     |
| Codeine                                                     | 4.2          | 2.8     | 2.2                      | 6.4               | 5.0        | 2.5                | 4.9               | 2.5                  | 5.9                 | 4.2                       | 4.2                    | 3.4                          | 3.1                | 4.9                                                                 | 4.1                     |
| Fentanyl patch                                              | 1.9          | 5.6     | 1.6                      | 1.3               | 1.4        | 2.5                | 0.0               | 3.2                  | 1.3                 | 3.5                       | 3.1                    | 0.6                          | 3.6                | 1.9                                                                 | 0.8                     |
| Methadone                                                   | 1.9          | 0.0     | 1.6                      | 1.3               | 1.7        | 2.1                | 1.6               | 3.0                  | 2.6                 | 5.6                       | 3.5                    | 1.7                          | 3.6                | 1.2                                                                 | 1.3                     |
| Buprenorphine (patch, tab, or film)                         | 0.9          | 0.0     | 0.4                      | 0.0               | 1.7        | 2.1                | 3.3               | 0.8                  | 0.0                 | 1.4                       | 1.0                    | 2.9                          | 0.4                | 0.6                                                                 | 0.9                     |
| Tapentadol                                                  | 0.2          | 0.0     | 0.0                      | 0.0               | 0.0        | 0.4                | 0.0               | 0.8                  | 0.0                 | 0.0                       | 0.3                    | 0.0                          | 0.4                | 0.2                                                                 | 0.1                     |
| Other (fentanyl lozenge, opium, butorphanol, hydromorphone, | 0.2          | 0.0     | 0.7                      | 0.0               | 0.0        | 0.4                | 0.0               | 0.2                  | 0.7                 | 0.7                       | 0.3                    | 0.0                          | 0.4                | 0.5                                                                 | 0.1                     |

**Supplemental table 1 (continued). Percent of patients who used opioids prior to surgery by surgical service and percentage of each type of opioid used.**

|                                                                          | Radiology | Otolaryngology - Head and Neck | Otolaryngology - All others | Plastics - Hand | Plastics - All others | Surgical Oncology | Transplant - Nephrectomy & Renal Transplant | Transplant - All others | Vascular | Thoracic - pulmonary | Thoracic - non-pulmonary | Urology - Transurethral | Urology - All others | Miscellaneous |
|--------------------------------------------------------------------------|-----------|--------------------------------|-----------------------------|-----------------|-----------------------|-------------------|---------------------------------------------|-------------------------|----------|----------------------|--------------------------|-------------------------|----------------------|---------------|
|                                                                          | 519       | 2563                           | 1354                        | 468             | 1565                  | 2262              | 227                                         | 411                     | 581      | 772                  | 373                      | 1046                    | 3222                 | 166           |
| Opioid use prior to surgery                                              | 32.9      | 20.5                           | 17.7                        | 30.1            | 19.0                  | 13.0              | 19.4                                        | 22.9                    | 27.4     | 15.3                 | 21.4                     | 26.2                    | 22.9                 | 25.9          |
| <b>Types of opioids used by pre-op opioid users</b>                      |           |                                |                             |                 |                       |                   |                                             |                         |          |                      |                          |                         |                      |               |
| Hydrocodone                                                              | 52.1      | 64.6                           | 67.1                        | 57.9            | 58.4                  | 56.0              | 54.5                                        | 53.7                    | 60.4     | 66.4                 | 64.6                     | 68.5                    | 65.2                 | 62.8          |
| Tramadol                                                                 | 21.9      | 17.7                           | 18.3                        | 20.0            | 25.2                  | 23.2              | 20.5                                        | 23.2                    | 15.7     | 16.0                 | 16.5                     | 14.7                    | 17.2                 | 16.3          |
| Oxycodone PO                                                             | 20.7      | 16.6                           | 16.3                        | 20.0            | 20.5                  | 15.4              | 20.5                                        | 21.1                    | 18.9     | 11.8                 | 11.4                     | 18.3                    | 17.3                 | 23.3          |
| Morphine                                                                 | 11.8      | 6.7                            | 4.2                         | 3.6             | 4.0                   | 4.1               | 0.0                                         | 12.6                    | 2.5      | 4.2                  | 13.9                     | 5.1                     | 5.7                  | 11.6          |
| Codeine                                                                  | 1.2       | 3.2                            | 2.5                         | 2.1             | 3.0                   | 9.9               | 6.8                                         | 0.0                     | 11.9     | 9.2                  | 3.8                      | 3.3                     | 4.5                  | 7.0           |
| Fentanyl patch                                                           | 2.4       | 2.3                            | 2.5                         | 0.7             | 2.7                   | 1.7               | 0.0                                         | 2.1                     | 1.3      | 1.7                  | 5.1                      | 1.1                     | 1.6                  | 0.0           |
| Methadone                                                                | 5.9       | 1.9                            | 1.7                         | 0.7             | 1.3                   | 0.0               | 2.3                                         | 1.1                     | 0.6      | 0.0                  | 1.3                      | 1.5                     | 1.5                  | 4.7           |
| Buprenorphine (patch, tab, or film)                                      | 0.6       | 0.8                            | 0.8                         | 3.6             | 1.0                   | 0.7               | 2.3                                         | 0.0                     | 1.3      | 0.0                  | 0.0                      | 0.7                     | 0.4                  | 0.0           |
| Tapentadol                                                               | 0.0       | 0.2                            | 0.0                         | 0.0             | 0.7                   | 0.0               | 0.0                                         | 0.0                     | 0.0      | 0.0                  | 0.0                      | 0.4                     | 0.0                  | 0.0           |
| Other (fentanyl lozenge, opium, butorphanol, hydromorphone, oxymorphone) | 0.0       | 0.0                            | 0.4                         | 0.7             | 0.0                   | 0.3               | 0.0                                         | 0.0                     | 0.0      | 0.8                  | 0.0                      | 0.0                     | 0.0                  | 0.0           |
